# Supplementary material for: Prediction of Mortality in Very Premature Infants: A Systematic Review of Prediction Models
Source: PLoS One. 2011 Sep 8;6(9):e23441. doi: 10.1371/journal.pone.0023441 (PMC3169543; doi:10.1371/journal.pone.0023441)
Supplement: Table S4 — Summary of input variables used in the 41 development studies. A total of 241 different input variables were used in the 41 studies describing development of a new prediction model. This table summarizes the variables by category. A complete list of the exact input variables used in each study, and their univariate and multivariate significance, is available from the authors upon request. (DOC) [file pone.0023441.s004.doc]

**Table S4: Summary of input variables used in the 41 development studies**

|  | size/maturity | | |  | | | maternal risk factors | | |  | | | | | | respiratory | | | | infant morbidities | | | |  | other | | |
| --- | --- | --- | --- | --- | --- | --- | --- | --- | --- | --- | --- | --- | --- | --- | --- | --- | --- | --- | --- | --- | --- | --- | --- | --- | --- | --- | --- |
|  | gestational age | birth weight | size for gestational age | gender | ethnicity | antenatal steroids | maternal age | hypertension | other MR | multiple gestation | presentation | mode of delivery | inborn/outborn | Apgar | temperature | blood gas | respiratory distress | ventilation / O2 supplementation | other R | congenital malformation | seizures | shock | other IM | infant laboratory |  | | |
| Behnke 1987 | S | U |  |  |  |  |  |  |  |  |  |  |  | S |  |  |  |  |  |  |  |  |  |  |  | | |
| Patterson 1988 | S | U | U | N |  |  |  |  | U | N | U | U |  | S | U |  |  |  | S |  |  |  |  |  | MR (pre-eclampsiaU, PROMU, antepartum hemorrhageU), respiratory signsS, year of birthNS | | |
| Horbar 1988 |  | S |  | S | S |  |  |  |  |  |  |  |  |  |  |  |  |  |  |  |  |  |  |  | center of birthS | | |
| Ales 1988 | -- | S |  |  | -- | -- | -- |  | -- |  |  | -- |  | S |  |  |  |  |  |  |  |  |  |  | crown-heel lengthU, head circumferenceU, parity--, MR(obstetric risk--), substance abuse--, smoking--, maternal medical risk--, cause of VLBW--, physician status-- | | |
| Tarnow-Mordi 1990 | S | S |  |  |  |  |  |  |  |  |  |  |  |  |  | S | S |  | S |  |  |  |  |  | R (FiO2S, 7 other), hospitalS, yearS | | |
| Horbar 1993 |  | S | S | S | S | U |  |  | U | U | U | U |  | S |  |  |  |  |  |  |  |  |  |  | prenatal careU, maternal complicationsU | | |
| INN 1993 | S | S |  |  |  | U |  |  |  | -- |  | -- | -- | -- | -- | S |  | -- | S | S | -- |  | -- | -- | pre-eclampsia--, resuscitation--, blood pressure--, R (respiratory diagnosis--, FiO2S, air leak--, 2 other), IM (cerebral hemorrhage--) | | |
| Carter 1995 | S | S | S | U | N |  | U |  | U |  | N | U |  | S |  |  | S |  | U |  | S |  | N | N | prenatal ultrasoundS, internal fetal monitoringNS, labor initiationNS. family densityS, maternal educationNS, MR (incompetent cervixNS, postpartum complicationsU, pre-eclampsiaU, spontaneous laborS, PROMNS. vaginal bleedingNS, placental diseaseNS), fetal distressNS, interstitial emphysemaU, IM (infectionNS, IVHNS, hydrocephalusNS, NECNS) | | |
| Roth 1995 |  | S |  | S | S |  |  |  |  |  |  |  |  |  |  |  |  |  |  |  |  |  |  |  | year of birthS | | |
| Ballot 1996 | U | U |  |  |  | N |  |  |  |  | N | N | N | U |  | S |  |  | S | U |  |  |  |  | R (FiO2S), CRIBU | | |
| Horbar 1997 |  | S | S | S | S | S |  |  |  | S |  | S | N | S |  |  |  |  |  | S |  |  |  |  | prenatal careS | | |
| Maier 1997 | -- | S |  | -- |  |  |  |  |  |  |  |  | -- | S | -- | S | S | S |  |  |  |  |  | -- | resuscitation-- | | |
| Sulkes 1998 | S | S | S | N |  |  | S | S | S |  | N | U |  | S |  |  | U |  |  |  | S |  | U |  | pretermNS, parityNS, gravidityNS, MR (cervical sutureNS, oliogohydroamniosisNS, diabetesNS, PROMS, placental diseaseNS) fetal distressS, apneaU, IM (sepsisNS, IVHU, PDAU) | | |
| Fowlie 1998 | U | U |  |  |  |  |  |  |  |  |  |  |  |  |  | N |  |  | N | N |  |  | S |  | R (FiO2NS), IM (NECS), CRIB-72hS | | |
| Zernikow 1998 | S | S | -- |  | -- |  |  |  |  | -- |  | -- | S | S | S | S |  |  |  | S |  |  | -- |  | MR (PROM-24h--), emergency deliveryS, transport duration--, condition vitally endangeredS, days intubated--, ventilated on transport--, BPD--, IM (IVH--, PVL--, survery required--), antibiotics--, transfustions--, year-- | | |
| Draper 1999 | S | S |  | S | S |  |  |  | S |  |  |  |  |  |  |  |  |  |  |  |  |  |  |  |  | | |
| Richardson 2001 |  | S | S | -- | -- |  |  |  |  | -- |  |  |  | S | S | S |  |  | S |  | S |  | S | -- | BPS, R (PO2/FiO2 ratioS, oxygenation index--), apnea--, respiratory signs--, stool guaiac--, IM (urine outputS), heart rate-- | | |
| Janota 2001 |  |  |  |  |  |  |  |  |  |  |  |  |  |  |  |  |  |  |  |  |  |  |  |  | respiratoryU, acid-baseU, CNSU, GIU, cardiovascularU, renalU, coagulationU | | |
| Gera 2001 | U | S | N |  |  |  |  |  | N |  |  |  |  | U | N | S |  | S | S | N | N | S |  | N | obstetric risksNS, maternal illnessNS, resuscitationU, BPNS, R (need O2NS, O2 gradientS, apneaNS, resp rateNS), IM (urine outputNS, ROPNS), CRIBNS | | |
| Parry 2003 | S | S |  | S |  |  |  |  |  |  |  | -- |  |  | S | S |  |  |  |  |  |  |  |  | surfactant-- | | |
| Marshall 2005 | S | S | U | S |  | S | U |  |  | N |  |  |  | S |  |  |  |  |  | S |  |  |  |  |  | | |
| Evans 2007 | S |  | S | S | U* | N | N | S | N | N | N | N | U | U |  |  |  |  |  |  |  |  |  |  | MR (previous perinatal deathNS, previous preterm birthNS, laborNS, PROMNS, p-PROMNS, antepartum hemorrhageNS), fetal distressU | | |
| Ambalavanan 2008 | -- | S |  | S | -- |  |  |  |  |  |  | -- | S |  |  |  |  |  | S |  | -- |  | -- |  | age at admissionS, R (FiO2S, oxygenation indexS, air leak--, pulm, hemorrahge--), mode of ventilation--, IM (GI bleed--, other bleed--, diagnosis--, indomethicin--, surfactant--, sedation--, response to iNO2--) | | |
| Basu 2008 | S | S | U |  |  | U | N | N | S |  |  |  |  | U | S |  | N |  |  |  |  | S |  | N | crown-heel lengthU, head circumferenceU, MR (gravidityNS, anemiaNS, heart diseaseNS, vaginal leakingNS, bleedingS), fetal distressU, meconiumU, birth asphyxiaU, apneaU, IM (ischemic encephalopathyU, IVHU) | | |
| Almeida 2008 | S | U | U | N |  | U | N | S |  | U |  | U |  | S |  |  | S | N |  |  |  |  |  |  | prenatal careNS, maternal educationNS, MR (diabetesNS, infectionNS), resuscitationU, IM (sepsisNS, PDAU), surfactant -deliveryNS, -72hU, SNAPU, hospitalS | | |
| Rosenberg 2008 | S | S |  | S |  |  |  |  |  |  |  |  |  |  | -- |  | N |  |  |  |  |  |  |  | birth asphyxiaNS, cry at birthNS, apneaNS, gruntingNS, tachypneaNS, lethargyNS, poor feedingNS | | |
| Cole 2010 | S |  | S | S |  |  |  |  |  |  |  |  |  |  |  | S |  |  |  |  |  |  |  |  |  | | |
| Ballot 2010 |  | S | U | S |  | N |  |  |  |  | N | U | S | N | U |  | U | S |  |  |  |  | S |  | prenatal careU, resuscitationS, hypotensionS, IM (sepsisNS, gram neg/posNS, IVH/PVLU, NECS, PDANS, HIVNS, syphilisNS, surfactantU) | | |
|  | size/maturity | | |  | | | maternal risks factors | | |  | | | | | | respiratory | | | | infant morbidities | | | |  | other | | |
|  | gestational age | birth weight | size for gestational age | gender | ethnicity | antenatal steroids | maternal age | hypertension | other MR | multiple gestation | presentation | mode of delivery | inborn/outborn | Apgar | temperature | blood gas | respiratory distress | ventilation / O2 supplementation | other R | congenital malformation | seizures | shock | other IM | infant laboratory |  | | |
| Herschel 1982 | S | -- |  | N | N | S |  |  |  |  | N | N |  |  |  |  |  | N |  |  |  |  |  |  | hospitalizationNS, MR (laborNS, PROMNS, abruptio placentaeNS), resuscitationS, IM (sepsisNS) | | |
| Zarfin 1986 |  | S |  |  |  |  |  |  |  |  |  | N |  | U | S | S |  |  |  |  |  |  |  |  | fused eyesNS, MR (PROMNS, vaginal dischargeNS), BPU, R (FiO2S, spontaneous breathingS, air leakNS, PIPU), time in NICUU, | | |
| Amon 1987 | S | S | N | S | S |  | N |  |  | N | N | N |  | S |  |  |  |  |  |  |  |  |  |  | prenatal careNS, maternal medsNS, anesthesiaNS, cervical dilationS, time - admission to deliveryU, MR (parity & gravidityNS, diagnosisNS), yearNS | | |
| Tyson 1996 | S | S | S |  | N | S |  |  |  | N |  |  |  | U |  |  |  |  |  |  |  |  |  |  | center of birthNS | | |
| Doyle 2001 | S | U | S | S | N | S |  |  |  | S |  | N |  |  |  |  |  | N |  |  |  |  | U |  | BPDNS, IM (CVHU, PVLNS, surgeryU, infant steroidsU, surfactantNS) | | |
| Ambalavanan 2001 | S | S |  | -- | S | S |  | -- |  | -- | -- | -- | -- | S |  |  | S | -- |  |  |  |  |  |  | betamimetics--, Mg sulfate--, MR (p-PROM--, antepartum hemorrhage--, chorioamnionitis--), fetal distress--, year-- | | |
| Locatelli 2005 | S | S | N | S |  | S |  |  |  |  |  | N |  | S |  | N |  |  |  |  |  |  |  |  | MR (oligohydroamniosisNS, pre-eclampsiaNS, PROMNS, placental diseaseNS), indicated deliveryU | | |
| Ambalavanan 2005 | S | S |  | S | S | S | -- | S | S | S |  |  |  | S |  |  | S | S | S |  |  |  | -- |  | prenatal care--, tocolyticsS, antibioticsS, marital statusS, MR (parity--, gravidity--, labor--, prepartum hemorrhageS), R (O2S, abnormal chest xray--), IM (indomethicin--), center mortality rateS | | |
| Ambalavanan 2006 | S | S |  | -- | S | S | -- |  |  | -- |  | -- | -- | S |  |  |  | -- |  |  |  |  | S | S | tocolytics--, Mg sulfate--, family composition--, education--, MR (pre-eclampsia--, PROM--), air leak--, pulmonary hemorrahge--, IM (sepsis--, meningitis--, cranial ultrasound abnormalitiesS, bowel perforation--, PDA--, urine output--, transfusionS, crystalloidsS) | | |
| Forsblad 2007 |  | N |  | N |  |  |  |  |  | S |  | N |  | S |  | N |  |  |  |  |  |  |  |  | CRIBS, level of careNS | | |
| Tyson 2008 | S | S |  | S | -- | S |  |  |  | S |  | -- |  |  |  |  |  |  |  |  |  |  |  |  |  | | |
| Forsblad 2008 |  | U | U | N |  |  | N |  |  | S |  | N |  | S |  |  |  |  |  | N |  |  |  |  | level of careNS | | |
| Gargus 2009 | U | S† | S† | S† | S† | S† | S† |  |  | S† |  | S† |  |  |  |  |  |  |  |  |  |  | N |  | birth lengthU, head circumferenceU, prenatal careS†, marital statusS†, maternal educationNS, insuranceNS, duration of ventilationU, chronic lung diseaseNS, IM (sepsisNS, IVHNS, PVLNS, NECNS, ROPNS), time to regain weightU, time in NICUU, number of morbiditiesU, infant steroidsNS | | |
| S – significant in multivariate analysis, included in final model  U – significant in univariate analysis, but not retained in final model  -- - univariate significance not reported, not retained in final model  N – not significant in univariate analysis and not retained in final model  *variable omitted due to missing data  †included in final model as part of a cluster  A complete list of input variables and their univariate and multivariate significance in each study is available upon request from the authors. | | | | | | | | | | | | | | | | | | | | | | | | | | PROM: premature rupture of membranes  p-PROM: prolonged premature rupture of membranes  FiO2: fraction inspired oxygen  IVH: intraventricular hemorrhage  NEC: necrotizing enterocolitis  PDA: patent ductus arteriosis  BPD: bronchopulmonary dysplasia  PVL: periventricular leukomalacia | BP: blood pressure  PO2: partial pressure of oxygen  CNS: central nervous system  GI: gastrointestinal (system)  ROP: retinopathy of prematurity  iNO2: inhaled nitric oxide  PIP: peak inspiratory pressure |

A total of 241 different input variables were used in the 41 studies describing development of a new prediction model. This table summarizes the variables by category. A complete list of the exact input variables used in each study, and their univariate and multivariate significance, is available from the authors upon request.
